# Supplementary material
Source: PubMed Central journal article supplement (PMC6427822)
Supplement: NIHMS1002848-supplement-1.pdf [file NIHMS1002848-supplement-1.pdf]

## Supplemental Information

### Mega-Analysis of Grey Matter Volume in Substance Dependence: General and Substance-Specific Regional Effects

Scott Mackey PhD,<sup>1</sup> Nicholas Algaier PhD,<sup>1</sup> Bader Chaarani PhD,<sup>1</sup> Philip Spechler BA,<sup>1</sup> Catherine Orr PhD,<sup>1</sup> Janice Bunn PhD,<sup>2</sup> Nicholas B. Allen PhD,<sup>3,4,5</sup> Nelly Alia-Klein PhD,<sup>6</sup> Albert Batalla MD PhD,<sup>7,8</sup> Sara Blaine PhD,<sup>9</sup> Samantha Brooks PhD,<sup>10</sup> Elisabeth Caparelli PhD,<sup>11</sup> Yann Ying Chye PhD,<sup>12</sup> Janna Cousijn PhD,<sup>13</sup> Alain Dagher MD,<sup>14</sup> Sylvane Desrivieres PhD,<sup>15</sup> Sarah Feldstein-Ewing PhD,<sup>16</sup> John J. Foxe PhD,<sup>17</sup> Rita Z. Goldstein PhD,<sup>6</sup> Anna E. Goudriaan PhD,<sup>18,19</sup> Mary M. Heitzeg PhD,<sup>20</sup> Robert Hester PhD,<sup>21</sup> Kent Hutchison PhD,<sup>22</sup> Ozlem Korucuoglu PhD,<sup>23</sup> Chiang-Shan R. Li MD PhD,<sup>9</sup> Edythe London PhD,<sup>24</sup> Valentina Lorenzetti PhD,<sup>12,25,26</sup> Maartje Luijten PhD,<sup>27</sup> Rocio Martin-Santos MD,<sup>7</sup> April May MA,<sup>28</sup> Reza Momenan MD,<sup>29</sup> Angelica Morales PhD,<sup>24</sup> Martin P. Paulus MD,<sup>30,31</sup> Godfrey Pearlson MA MBBS,<sup>9</sup> Marc-Etienne Rouseau MSc,<sup>14</sup> Betty Jo Salmeron MD,<sup>11</sup> Renée Schluter PhD,<sup>18</sup> Lianne Schmaal PhD,<sup>3,32</sup> Gunter Schumann MD PhD,<sup>15</sup> Zsuzsika Sjoerds PhD,<sup>33,34</sup> Dan J. Stein PhD,<sup>10</sup> Elliot A. Stein PhD,<sup>11</sup> Rajita Sinha PhD,<sup>9</sup> Nadia Solowij PhD,<sup>35</sup> Susan Tapert PhD,<sup>36</sup> Anne Uhlmann PhD,<sup>10</sup> Dick Veltman MD PhD,<sup>37</sup> Ruth van Holst PhD,<sup>18</sup> Sarah Wittle PhD,<sup>5,38</sup> Margaret J. Wright PhD,<sup>39</sup> Murat Yucel PhD,<sup>38,12</sup> Sheng Zhang PhD,<sup>9</sup> Deborah Yurgelun-Todd PhD,<sup>40</sup> Derrek P. Hibar PhD,<sup>41</sup> Neda Jahanshad PhD,<sup>41</sup> Alan Evans PhD,<sup>14</sup> Paul M. Thompson PhD,<sup>41</sup> David C. Glahn PhD,<sup>9</sup> Patricia Conrod PhD,<sup>42</sup> Hugh Garavan PhD,<sup>1</sup> and the ENIGMA Addiction Working Group

1. Department of Psychiatry, University of Vermont, Burlington VT, USA
2. Department of Mathematics and Statistics, University of Vermont, Burlington VT, USA
3. Orygen, The National Centre of Excellence in Youth Mental Health, Parkville, Australia
4. Department of Psychology, University of Oregon, Eugene OR, USA
5. Melbourne School of Psychological Sciences, The University of Melbourne, Melbourne, Australia
6. Department of Psychiatry, Icahn School of Medicine at Mount Sinai, New York City NY, USA
7. Department of Psychiatry and Psychology, University of Barcelona, Barcelona, Spain
8. Department of Psychiatry, Donders Institute for Brain, Cognition and Behaviour, Radboud University Medical Center, Nijmegen, The Netherlands
9. Department of Psychiatry, Yale University School of Medicine, New Haven CT, USA
10. Department of Psychiatry and MRC Unit on Anxiety & Stress Disorders, University of Cape Town, Cape Town, South Africa
11. Neuroimaging Research Branch, Intramural Research Program, National Institute on Drug Abuse, Baltimore, USA
12. Monash Institute of Cognitive and Clinical Neurosciences & School of Psychological Sciences, Monash University, Melbourne, Australia
13. Departments of Developmental and Experimental Psychology, Utrecht University, Utrecht, the Netherlands
14. Brain Imaging Center, Montreal Neurological Institute, McGill University, Montreal QC, Canada
15. Centre for Population Neuroscience and Precision Medicine, Institute of Psychiatry, Psychology and Neuroscience, King's College London, London, UK
16. Department of Psychiatry, Oregon Health & Science University, Portland OR, USA

17. Department of Neuroscience & The Ernest J. Del Monte Institute for Neuroscience, University of Rochester School of Medicine and Dentistry, Rochester NY, USA
18. Department of Psychiatry, University of Amsterdam, Amsterdam, the Netherlands
19. Amsterdam Institute for Addiction Research & Arkin Mental Health Care, Amsterdam, The Netherlands
20. Department of Psychiatry, University of Michigan, Ann Arbor MI, USA
21. Melbourne School of Psychological Sciences, University of Melbourne, Melbourne, Australia
22. Department of Psychology and Neuroscience, University of Colorado Boulder, Boulder, USA
23. Department of Psychiatry, Washington University School of Medicine, St. Louis MO, USA
24. David Geffen School of Medicine, University of California at Los Angeles, Los Angeles, USA
25. School of Psychology, Faculty of Health Sciences, Australian Catholic University, Melbourne, Australia
26. Department of Psychological Sciences, the University of Liverpool, Liverpool, UK
27. Behavioural Science Institute, Radboud University, Nijmegen, the Netherlands
28. Joint Doctoral Program in Clinical Psychology, San Diego State University/University of California, San Diego, USA
29. Clinical NeuroImaging Research Core, Division of Intramural Clinical and Biological Research, National Institute on Alcohol Abuse and Alcoholism, Bethesda MD, USA
- 30 VA San Diego Healthcare System and Department of Psychiatry, University of California San Diego, La Jolla, USA
31. Laureate Institute for Brain Research, Tulsa OK, USA
32. Centre for Youth Mental Health, The University of Melbourne, Melbourne, Australia
33. Department of Neurology, Max Planck Institute for Human Cognitive and Brain Sciences, Leipzig, Germany
34. Institute of Psychology, Cognitive Psychology Unit & Leiden Institute for Brain and Cognition, Leiden University, Leiden, Netherlands
35. School of Psychology and Illawarra Health and Medical Research Institute, University of Wollongong, Wollongong, Australia
- 36 Department of Psychiatry, University of California San Diego, La Jolla, USA
37. Department of Psychiatry, VU University Medical Center, Amsterdam, the Netherlands
38. Melbourne Neuropsychiatry Centre, Department of Psychiatry, The University of Melbourne and Melbourne Health, Melbourne, Australia
- 39 QIMR Berghofer Medical Research Institute, Brisbane, Australia
40. Department of Psychiatry, University of Utah School of Medicine, Salt Lake City UT, USA
41. Imaging Genetics Center, Department of Neurology Keck School of Medicine, University of Southern California, Marina del Rey, USA.
42. Department of Psychiatry, Université de Montreal, CHU Ste Justine Hospital, Montreal QC, Canada

## Supplemental Methods

### *Summary of ENIGMA protocols for multi-site studies*

The ENIGMA protocols for multi-site analyses have been described and validated in many previous publications.<sup>47-50</sup> Although neuroimaging data was collected at different sites using a variety of acquisition protocols (see Supplemental Table 1), all datasets were prepared in Freesurfer (version 5.3), a fully automated MRI processing pipeline that identifies 7 bilateral subcortical and 34 bilateral cortical

regions-of-interest.<sup>51,52</sup> Quality control procedures were performed at each site according to standardized protocols. Step-by-step instructions for the ENIGMA imaging quality control protocols are publicly available online: <http://enigma.ini.usc.edu/protocols/imaging-protocols/>. Downloadable Matlab scripts produce images from individual brains in a series of standard planes that are inspected visually. Although the standard set of images generated from every participant's brain scan is visually reviewed, the protocol scripts also create a separate log of outliers, which are flagged for greater scrutiny during visual inspection. Subjects are excluded from the analysis if structures are poorly segmented or mislabeled. The protocols include specific illustrations of good and bad segmentation. Histograms are also generated to confirm the normal distribution of volume/thickness of each region-of-interest at each site. An additional level of visual inspection was performed centrally at the University of Vermont on a randomly selected sub-sample of participants from each study to ensure uniformity of quality control across sites.

#### *Investigation of Site\*dependence diagnosis interactions*

To investigate the possibility of site by dependence diagnosis interactions, Models 1 and 2 were recalculated with an additional 'site x diagnosis' term included as a random factor. There was no significant site by diagnosis interaction for any region-of-interest in either Model 1 or 2. As a consequence, the interaction term was dropped from the model reported in the main Results section.

#### *Past 30 Day Use*

Linear mixed effects models were used to determine whether past 30 day nicotine or past 30 day alcohol use was related to the volume/thickness of regions-of-interest identified by Model 1 or 2 (i.e. those brain regions listed in Table 2). Past 30 day use of nicotine and alcohol is based on self-reported number of cigarettes and alcoholic drinks consumed in the past 30 days. Only dependent individuals were included in this analysis. Age, sex and intracranial volume were included as covariates while site was entered as a random factor. Past 30 day nicotine and alcohol use was measured only in a subset of the studies, i.e. this information was available on 37.7% and 42.2% of dependent participants, respectively. Due to the reduced sample size, an optimized split half strategy was not used in the analysis of past 30 day use. Since a model was constructed for each region-of-interest, a false discovery rate method (i.e. the Benjamini-Hochberg procedure) was used to control for multiple comparisons.

#### *Support Vector Machine classification*

Support vector machine classification was implemented in MATLAB with a radial basis function kernel, tuned by parameter sweep in a 10-fold inner loop, nested within an optimized split-half cross validation.<sup>53</sup> The radial basis function kernel has two parameters: the box constraint  $C$ , and kernel width  $\sigma$ . The box constraint determines the extent of misclassification tolerated within the training set ( $C=0$  corresponds to a hard-margin classifier that disallows training error), and the kernel width determines the spread of the Gaussian filter on training sample similarity (as measured by Euclidean distance in feature space) imposed by the RBF kernel. The parameters  $C$  and  $\sigma$  were tuned to maximize independent test classification area-under-the-curve within a 10-fold validation. For each half of the optimized split-half: (1) The data were divided into 10 stratified groups (same case-to-control ratio in each); (2) one group was selected to be the independent test; (3) four hundred support vector machine classifiers were trained on the remaining 90% of the data, one for each pair of  $C$  and  $\sigma$ , each selected from a range of 20 values in log space ( $C, \sigma$  in  $2^{54}$ ); (4) each support vector machine was used to classify

the test group (the left-out 10%), area-under-the-curve was computed, and thus each pair of parameter values had an associated area-under-the-curve for this test; (5) steps (2)-(4) were repeated nine more times, allowing each group to be the test set once; and finally (6) the pair of parameter values with the highest mean area-under-the-curve across the 10 tests was selected to train the final support vector machine classifier for this half, which was then tested against the other half.

## Supplemental Results

Supplemental Table 1. Additional information about the samples collected at individual sites. ASI-Lite, Addiction Severity Index-Lite;<sup>55</sup> AUDIT, Alcohol Use Disorders Identification Test;<sup>56</sup> CIDI, Composite International Diagnostic Interview;<sup>57</sup> FTND, Fagerstrom Test for Nicotine Dependence;<sup>58</sup> K-SADS, Schedule for Affective Disorders and Schizophrenia for School-Aged Children;<sup>59</sup> MINI Plus, Mini-International Neuropsychiatric Interview-Plus;<sup>60</sup> PRISM, Psychiatric Research Interview for Substance and Mental Disorders;<sup>61</sup> **SCID**, Structured Clinical Interview for the DSM-IV Disorders.<sup>62</sup>

| Substance | PI                  | Study Name  | Total Sample (Female) | Mean Age $\pm$ SD | SUD              | Diagnostic Instrument | Scan Parameters                                                                                                                                    | References                                                                                                                                |
|-----------|---------------------|-------------|-----------------------|-------------------|------------------|-----------------------|----------------------------------------------------------------------------------------------------------------------------------------------------|-------------------------------------------------------------------------------------------------------------------------------------------|
| Alcohol   | Hutchison           | ETOH        | 378 (138)             | 28.7 $\pm$ 8.1    | 378              | SCID                  | 3T, 5-echo multi-echo MPRAGE, TR=2530ms, TE= 1.64, 3.5, 5.36, 7.22 & 9.08 ms, flip angle=7°, matrix= 256x256x176, voxel size=1x 1x1mm <sup>3</sup> | Thayer <i>et al.</i> , 2016 <sup>63</sup>                                                                                                 |
|           | Hutchison           | Olanzapine  | 157 (58)              | 39.5 $\pm$ 8.8    | 157              | SCID                  | 3T, 5-echo multi-echo MPRAGE, TR=2530ms, TE= 1.64, 3.5, 5.36, 7.22 & 9.08 ms, flip angle=7°, matrix= 256x256x176, voxel size=1x 1x1mm <sup>3</sup> | Claus <i>et al.</i> , 2011 <sup>64</sup>                                                                                                  |
|           | Sinha               | IRC         | 127 (32)              | 31.2 $\pm$ 8.5    | 43               | SCID                  | 3T, MPRAGE, TR =2530ms, TE=3.34ms, 1 flip angle=7°, matrix/FOV = 256x256x176, voxel size = 1x1x1mm <sup>3</sup>                                    | Sinha & Li, 2007 <sup>65</sup><br>Li <i>et al.</i> , 2009 <sup>66</sup><br>Seo <i>et al.</i> , 2011 <sup>67</sup>                         |
|           | Momenan             | NIAAA       | 342 (120)             | 35.5 $\pm$ 10.0   | 203              | SCID                  | 3T, MPRAGE , TR=4.5-7.8 ms, TE=2.2-3.1ms, flip angle =6°, voxelsize=0.9x0.9 x1-1.5mm <sup>3</sup>                                                  | Senatorov <i>et al.</i> , 2015 <sup>68</sup><br>Grodin <i>et al.</i> , 2013 <sup>69</sup><br>Momenan <i>et al.</i> , 2012 <sup>70</sup>   |
|           | Korucuoglu          | Neuro-ADAPT | 41 (17)               | 19.1 $\pm$ 1.7    | 18               | AUDIT                 | 3T, Gradient Echo, TR=8.17ms, TE=3.8ms, flip angle=8°, matrix=240x240 x220, voxelsize=1x1x1mm <sup>3</sup>                                         | Korucuoglu <i>et al.</i> , 2016 <sup>71</sup>                                                                                             |
|           | Schmaal/Veltman     | TriP study  | 48 (0)                | 40.5 $\pm$ 9.0    | Alc 16<br>Coc 16 | MINI Plus             | 3T, Gradient Echo, TR=9ms, TE=3.5ms, flip angle=8°, matrix=256x256x170, voxel size=1x1x1mm <sup>3</sup>                                            | Schmaal <i>et al.</i> , 2014 <sup>72</sup>                                                                                                |
|           | Sjoerds/Veltman     | NESDA-AD    | 61 (25)               | 48.2 $\pm$ 9.1    | 42               | CIDI                  | 3T, Gradient Echo, TR=9ms, TE 3.6 ms, flip angle=8°, matrix= 256x231x170, voxel size=1x1x1mm <sup>3</sup>                                          | Sjoerds <i>et al.</i> , 2014 <sup>73</sup>                                                                                                |
|           | Goudriaan/Van Holst | ADPG study  | 52 (0)                | 40.5 $\pm$ 10.4   | 28               | CIDI                  | 3T, Gradient Echo, TR=9ms TE=4.20ms, flip angle 8°, matrix=256x256x170, voxel size=1x1x1mm <sup>3</sup>                                            | Jansen <i>et al.</i> , 2015 <sup>74</sup><br>van Holst <i>et al.</i> , 2014 <sup>75</sup><br>van Holst <i>et al.</i> , 2012 <sup>76</sup> |
| Nicotine  | Dagher              | CYP         | 31 (9)                | 24.9 $\pm$ 4.3    | 31               | FTND                  | 3T, MPRAGE, TR=2300ms, TE=2.98ms, flip angle=9°, matrix=256x256x172, voxel size=1x1x1 mm <sup>3</sup>                                              | Tang <i>et al.</i> , 2012 <sup>77</sup>                                                                                                   |

|                 |                       |                      |           |                |     |             |                                                                                                                                                 |                                                                                                                                                 |
|-----------------|-----------------------|----------------------|-----------|----------------|-----|-------------|-------------------------------------------------------------------------------------------------------------------------------------------------|-------------------------------------------------------------------------------------------------------------------------------------------------|
|                 | Hutchison             | BISCUE               | 123 (54)  | 31.0<br>± 10.1 | 123 | FTND        | 3T, 5-echo multi-echo MPRAGE, TR=2530ms, TE=1.64, 3.5, 5.36, 7.22 & 9.08 ms, flip angle=7°, matrix=256x256x176, voxel size=1x1x1mm <sup>3</sup> | Claus et al., 2013 <sup>78</sup>                                                                                                                |
|                 | Hutchison             | Varenicline          | 183 (72)  | 34.3<br>± 9.9  | 183 | FTND        | 3T, MPRAGE, TR=2300ms, TE=2.74ms, flip angle = 8°, matrix = 256x256x176, voxel size =1x1x1mm <sup>3</sup>                                       |                                                                                                                                                 |
|                 | London                | Young Smokers        | 98 (61)   | 19.4<br>± 1.3  | 37  | SCID        | 3T, MPRAGE, TR=1900-2530 ms, TE=2.26-3.31ms, flip angle=7-9°, matrix=256x256x160 voxel size=1x1x1mm <sup>3</sup>                                | Morales et al., 2014 <sup>79</sup>                                                                                                              |
|                 | E Stein               | Smokers              | 371 (181) | 30.8<br>± 9.0  | 184 | FTND        | 3T, MPRAGE, TR=2500ms, TE=4.38ms, flip angle=8°, matrix=256x192x160 voxel size=1x1x1mm <sup>3</sup>                                             | Zhang et al., 2011 <sup>80</sup><br>Rose et al., 2012 <sup>81</sup><br>Sutherland et al., 2013 <sup>82</sup><br>Ding et al., 2015 <sup>83</sup> |
|                 | Luijten/<br>Veltman   | DABIS                | 86 (28)   | 22.6<br>± 2.8  | 43  | FTND        | 3T, Inversion Recovery Fast Spoiled Gradient Recalled Echo (FSPGR), TR=10.6ms, TE=2.2ms, matrix=416x256x192, voxel size = 1x1x1mm <sup>3</sup>  | Luijten et al., 2012 <sup>84</sup>                                                                                                              |
| <b>Cocaine</b>  | Garavan/<br>Foxe      |                      | 43 (6)    | 38.0<br>± 10.4 | 27  | SCID        | 3T, MPRAGE, TR=11.6ms, TE=4.9ms, flip angle = 8°, matrix=256x256x172, voxel size = 1.2x1.2x1.2 mm <sup>3</sup>                                  | Bell et al., 2014 <sup>85</sup>                                                                                                                 |
|                 | Li                    |                      | 98 (26)   | 42.5<br>± 7.4  | 98  | SCID        | 3T, sagittal 3D MPRAGE, TR=2530ms, TE=3.66ms, flip angle=7°, matrix=256 x256, voxel size=1x1x1mm <sup>3</sup>                                   | Luo et al., 2013 <sup>86</sup>                                                                                                                  |
|                 | Sinha                 | SCOR                 | 79 (41)   | 33.9<br>± 8.4  | 33  | SCID        | 3T, MPRAGE, TR =2530ms, TE=3.34ms, 1 flip angle=7°, matrix=256x256x176, voxel size = 1x1x1mm <sup>3</sup>                                       | Li et al., 2005 <sup>87</sup><br>Li et al., 2008 <sup>88</sup><br>Seo et al., 2017 <sup>89</sup>                                                |
|                 | E Stein               |                      | 90 (20)   | 40.2<br>± 7.5  | 47  | SCID        | 3T, MPRAGE, TR=1900ms, TE=3.51ms, flip angle= 9°, matrix=256x192x208, voxel size =1x1x1mm <sup>3</sup>                                          | Gu et al., 2010 <sup>90</sup><br>Rose et al., 2014 <sup>81</sup><br>Hu et al., 2015 <sup>91</sup><br>Liang et al., 2015 <sup>92</sup>           |
| <b>Meth</b>     | London                |                      | 181 (94)  | 33.5<br>± 9.0  | 80  | SCID        | 1.5T, MPRAGE, TR=1900ms, TE=4.38ms, flip angle=15°, matrix=256x256x160, voxel size=1x1x1mm <sup>3</sup>                                         | Tabibnia et al., 2011 <sup>93</sup><br>Morales et al., 2012 <sup>94</sup>                                                                       |
|                 | Paulus                | Relapse              | 91 (29)   | 37.6<br>± 11.4 | 60  | SCID        | 3T, Spoiled gradient recalled (SPGR), TR=8 ms, TE=3ms, flip angle=12°, matrix=192x256x172, voxel size=0.97x0.97x1mm <sup>3</sup>                | Stewart et al., 2014 <sup>95</sup>                                                                                                              |
|                 | D Stein               | Meth-CT              | 129 (26)  | 27.1<br>± 6.4  | 68  | SCID        | 3T, Multiecho MPRAGE TR=2530ms;graded TE=1.53, 3.21, 4.89, 6.57ms; flip angle=7°; slices=160; voxel size=1x1x1mm <sup>3</sup>                   | Uhlmann et al., 2016 <sup>96</sup>                                                                                                              |
| <b>Cannabis</b> | Garavan/<br>Hester    | Trinity-THC          | 30 (6)    | 22.8<br>± 3.9  | 15  | ASI Lite-CF | 3T,MPRAGE, TR=2000ms, TE=3ms, flip angle=12°, matrix=256x256x176, voxel size=0.9x0.9x0.9mm <sup>3</sup>                                         | Hester et al., 2009 <sup>97</sup>                                                                                                               |
|                 | Garavan               | Orr                  | 27 (2)    | 16.4<br>± 1.5  | 13  | CIDI-SF     | 3T, MPRAGE, TR=2300ms, TE=3ms, flip angle=12°, matrix=256x256x180, voxelsize=0.9x0.9x0.9mm <sup>3</sup>                                         | Orr et al., 2013 <sup>98</sup>                                                                                                                  |
|                 | Cousijn/<br>Goudriaan | Cannabis Prospective | 78 (27)   | 21.6<br>± 2.4  | 38  | MINI        | 3T, Turbo Field Echo, TR=9.6 ms, TE=4.6ms, flip angle 8°, matrix=256x256x182,                                                                   | Cousijn et al., 2012 <sup>99</sup><br>Cousijn et al., 2013 <sup>100</sup><br>Cousijn et al., 2014 <sup>101</sup>                                |

|  |               |                                    |          |                |    |        |                                                                                                                                                   |                                                                                                                                                                                           |
|--|---------------|------------------------------------|----------|----------------|----|--------|---------------------------------------------------------------------------------------------------------------------------------------------------|-------------------------------------------------------------------------------------------------------------------------------------------------------------------------------------------|
|  |               |                                    |          |                |    |        | voxelsize =1x1x1.2mm <sup>3</sup>                                                                                                                 |                                                                                                                                                                                           |
|  | Allen         | ADS                                | 100 (50) | 19.0<br>± 0.5  | 7  | K-SADS | 3T, gradient echo volumetric acquisition, TR=36ms, TE=9ms, flip angle=35°, matrix=410x410, voxel size=1.5x0.49x0.49 mm <sup>3</sup>               |                                                                                                                                                                                           |
|  | Martin-Santos | Chronic cannabis users (Barcelona) | 59 (0)   | 21.7<br>± 2.9  | 30 | PRISM  | 1.5T, Fast Spoiled Gradient Inversion-Recovery, TR=11.8 ms, TE=4.2ms, flip angle=15°, matrix=256x256x124, voxel size=1.17x1.17x1.2mm <sup>3</sup> | Blanco-Hinojo <i>et al.</i> , 2016 <sup>102</sup><br>Pujol <i>et al.</i> , 2014 <sup>103</sup><br>Batalla <i>et al.</i> , 2014 <sup>104</sup>                                             |
|  | Solowij       | Chronic Cannabis                   | 34 (3)   | 36.9<br>± 9.8  | 16 | SCID   | 3T, Spoiled Gradient-Recalled Echo, TR=6.4ms, TE=2.9ms, flip angle=8°, matrix= 256x256x180, voxel size=1x1x1mm <sup>3</sup>                       | Yucel <i>et al.</i> , 2008 <sup>105</sup><br>Solowij <i>et al.</i> , 2011 <sup>106</sup><br>Solowij <i>et al.</i> , 2013 <sup>107</sup><br>Lorenzetti <i>et al.</i> , 2015 <sup>108</sup> |
|  | Yucel         | Chronic Cannabis-Memory            | 103 (55) | 31.5<br>± 11.0 | 66 | SCID   | 3T, MPRAGE, TR=1900ms, TE=2.15ms, flip angle=, matrix=256x256x176, voxelsize=1x1x1mm <sup>3</sup>                                                 | Zalesky <i>et al.</i> , 2012 <sup>109</sup><br>Harding <i>et al.</i> , 2012 <sup>110</sup><br>Jakabek <i>et al.</i> , 2016 <sup>111</sup><br>Yücel <i>et al.</i> , 2016 <sup>112</sup>    |

Supplemental Table 2. At-a-glance summary of left and right hemisphere regions-of-interest that exhibited lower subcortical volume/cortical thickness. Names of the cortical regions-of-interest are as they appear in the Freesurfer atlas. In Model 1, all individuals were classified as either dependent or non-dependent. In Model 2, individuals were sorted by dependence on one and only one substance, i.e. individuals dependent on more than one substance were excluded from Model 2. Comparison of estimated marginal means for dependence on alcohol and cocaine relative to non-dependent controls are presented for Model 2. There were no significant associations with nicotine, methamphetamine or cannabis dependence on their own. The additional contrast in Model 2 included individuals dependent on nicotine, cocaine, methamphetamine and cannabis (i.e. but not alcohol). An 'X' indicates detection of association using false discovery rate procedure in the first half of the data and confirmation at  $p < 0.05$  in the second half of the data. An 'Q' indicates region-of-interest was significantly associated with dependence in Model 1 but not with dependence on any particular substance in Model 2.

|                           | Model 1 |       | Model 2          |                  |                   |
|---------------------------|---------|-------|------------------|------------------|-------------------|
|                           | Left    | Right | Left             | Right            |                   |
|                           |         |       | Alcohol vs. Ctrl | Cocaine vs. Ctrl | Contrast vs. Ctrl |
| <b>Subcortical Volume</b> |         |       |                  |                  |                   |
| Thalamus                  |         |       |                  |                  | X                 |
| Caudate Nucleus           |         |       |                  |                  |                   |
| Putamen                   |         |       | X                |                  | X                 |
| Globus Pallidus           |         |       |                  |                  | X                 |
| Hippocampus               | X       | X     | X                |                  | X                 |
| Amygdala                  | X       | X     | X                |                  | X                 |
| Nucleus Accumbens         |         | X     | X                |                  | X                 |

| <b>Cortical Thickness</b>  |          |          |   |   |     |
|----------------------------|----------|----------|---|---|-----|
| Banks Sup. Temporal Sulcus |          |          |   |   |     |
| Caudal Anterior Cingulate  |          |          |   |   |     |
| Caudal Middle Frontal      | X        |          | X |   | X   |
| Cuneus                     |          |          |   |   |     |
| Entorhinal                 |          |          |   |   |     |
| Frontal Pole               |          |          |   |   |     |
| Fusiform                   | X        |          | X |   | X   |
| Inferior Parietal          | <u>Q</u> |          |   | X |     |
| Inferior Temporal          |          |          | X |   | X   |
| Insula                     | X        | <u>Q</u> | X | X | X   |
| Isthmus Cingulate          |          | X        |   |   | X   |
| Lateral Occipital          |          |          |   |   | X   |
| Lateral Orbitofrontal      |          |          |   |   | X   |
| Lingual                    |          |          |   |   |     |
| Medial Orbitofrontal       |          | <u>Q</u> | X |   |     |
| Middle Temporal            | <u>Q</u> | <u>Q</u> |   |   |     |
| Parahippocampal            |          |          | X |   |     |
| Paracentral Lobule         | X        | X        | X |   | X   |
| Pars Opercularis           |          |          |   |   |     |
| Pars Orbitalis             |          |          |   |   |     |
| Pars Triangularis          |          |          |   |   |     |
| Pericalcarine              |          |          |   |   |     |
| Postcentral                |          |          |   |   |     |
| Posterior Cingulate        |          |          | X |   | X   |
| Precentral                 | X        | X        | X |   | X   |
| Precuneus                  | X        |          | X |   | X   |
| Rostral Anterior Cingulate |          |          | X |   |     |
| Rostral Middle Frontal     |          |          |   |   |     |
| Superior Frontal           |          |          | X |   | X   |
| Superior Parietal          | X        |          | X |   |     |
| Superior Temporal          |          |          | X |   |     |
| Supramarginal              | <u>Q</u> | X        |   |   | X X |
| Temporal Pole              |          |          |   |   | X   |
| Transverse Temporal        |          |          |   |   |     |

Supplemental Table 3. Two classifications per drug were generated using a machine learning approach i.e. a support vector machine was trained on the first half of the data, tested on the second half, and vice versa. The classification of alcohol and nicotine dependence was significant in both while the classification for cocaine came exceptionally close to being significant. The top twenty features in each decision function were determined as described in the Methods Section. The Table lists the top twenty features in each classification. The third column lists ROIs which appeared in both lists. Names of the cortical ROIs are as they appear in the Freesurfer atlas.

| Trained on 1 <sup>st</sup> Half,<br>Tested on 2 <sup>nd</sup> Half               | Trained on 2 <sup>nd</sup> Half,<br>Tested on 1 <sup>st</sup> Half                  | Appeared in Both Lists                                                            |
|----------------------------------------------------------------------------------|-------------------------------------------------------------------------------------|-----------------------------------------------------------------------------------|
| <b><i>Alcohol</i></b>                                                            |                                                                                     |                                                                                   |
| 1. Right Amygdala<br>2. Right Hippocampus<br>3. Left Putamen<br>4. Right Putamen | 1. Left Hippocampus<br>2. Right Hippocampus<br>3. Left Putamen<br>4. Right Thalamus | <i>Subcortical</i><br>Right Amygdala<br>Right Globus Pallidus<br>Left Hippocampus |

|                                                                                                                                                                                                                                                                                                                                                                                                                                                                                                                                                                                                                                                                                                                                                              |                                                                                                                                                                                                                                                                                                                                                                                                                                                                                                                                                                                                                                                                                                                                   |                                                                                                                                                                                                                                                                                                         |
|--------------------------------------------------------------------------------------------------------------------------------------------------------------------------------------------------------------------------------------------------------------------------------------------------------------------------------------------------------------------------------------------------------------------------------------------------------------------------------------------------------------------------------------------------------------------------------------------------------------------------------------------------------------------------------------------------------------------------------------------------------------|-----------------------------------------------------------------------------------------------------------------------------------------------------------------------------------------------------------------------------------------------------------------------------------------------------------------------------------------------------------------------------------------------------------------------------------------------------------------------------------------------------------------------------------------------------------------------------------------------------------------------------------------------------------------------------------------------------------------------------------|---------------------------------------------------------------------------------------------------------------------------------------------------------------------------------------------------------------------------------------------------------------------------------------------------------|
| <ul style="list-style-type: none"> <li>5. Right Fusiform</li> <li>6. Right Nucleus Accumbens</li> <li>7. Left Superior Frontal</li> <li>8. Left Hippocampus</li> <li>9. Left Paracentral</li> <li>10. Left Inferior Temporal</li> <li>11. Left Caudal Middle Frontal</li> <li>12. Right Superior Frontal</li> <li>13. Left Amygdala</li> <li>14. Left Isthmus Cingulate</li> <li>15. Right Precentral</li> <li>16. Right Lateral Occipital</li> <li>17. Left Posterior Cingulate</li> <li>18. Left Precuneus</li> <li>19. Right Globus Pallidus</li> <li>20. Right Paracentral</li> </ul>                                                                                                                                                                    | <ul style="list-style-type: none"> <li>5. Right Posterior Cingulate</li> <li>6. Right Nucleus Accumbens</li> <li>7. Left Insula</li> <li>8. Left Posterior Cingulate</li> <li>9. Left Fusiform</li> <li>10. Right Fusiform</li> <li>11. Right Insula</li> <li>12. Right Lateral Orbitofrontal</li> <li>13. Right Globus Pallidus</li> <li>14. Left Thalamus</li> <li>15. Right Precentral</li> <li>16. Right Paracentral</li> <li>17. Left Precentral</li> <li>18. Left Superior Frontal</li> <li>19. Left Nucleus Accumbens</li> <li>20. Right Amygdala</li> </ul>                                                                                                                                                               | <ul style="list-style-type: none"> <li>Right Hippocampus</li> <li>Right Nucleus Accumbens</li> <li>Left Putamen</li> <br/> <li><i>Cortical</i></li> <li>Right Fusiform</li> <li>Left Superior Frontal</li> <li>Right Paracentral</li> <li>Left Posterior Cingulate</li> <li>Right Precentral</li> </ul> |
| <b>Nicotine</b>                                                                                                                                                                                                                                                                                                                                                                                                                                                                                                                                                                                                                                                                                                                                              |                                                                                                                                                                                                                                                                                                                                                                                                                                                                                                                                                                                                                                                                                                                                   |                                                                                                                                                                                                                                                                                                         |
| <ul style="list-style-type: none"> <li>1. Right Inferior Temporal</li> <li>2. Left Temporal Pole</li> <li>3. Right Pericalcarine</li> <li>4. Left Rostral Anterior Cingulate</li> <li>5. Left Medial Orbitofrontal</li> <li>6. Left Fusiform</li> <li>7. Right Temporal Pole</li> <li>8. Right Cuneus</li> <li>9. Left Insula</li> <li>10. Right Posterior Cingulate</li> <li>11. Right Caudal Anterior Cingulate</li> <li>12. Right Putamen</li> <li>13. Right Medial Orbitofrontal</li> <li>14. Right Fusiform</li> <li>15. Left Posterior Cingulate</li> <li>16. Right Rostral Anterior Cingulate</li> <li>17. Right Inferior Parietal</li> <li>18. Left Superior Temporal</li> <li>19. Left Amygdala</li> <li>20. Right Lateral Orbitofrontal</li> </ul> | <ul style="list-style-type: none"> <li>1. Left Nucleus Accumbens</li> <li>2. Right Caudate</li> <li>3. Left Inferior Parietal</li> <li>4. Right Fusiform</li> <li>5. Left Pericalcarine</li> <li>6. Left Rostral Anterior Cingulate</li> <li>7. Right Pars Opercularis</li> <li>8. Left Caudate</li> <li>9. Left Cuneus</li> <li>10. Right Medial Orbitofrontal</li> <li>11. Left Fusiform</li> <li>12. Left Lingual</li> <li>13. Right Frontal Pole</li> <li>14. Left Parahippocampal</li> <li>15. Right Entorhinal</li> <li>16. Right Banks Superior Temporal</li> <li>17. Right Superior Frontal</li> <li>18. Right Lateral Occipital</li> <li>19. Left Lateral Orbitofrontal</li> <li>20. Left Transverse Temporal</li> </ul> | <ul style="list-style-type: none"> <li><i>Cortical</i></li> <li>Left Fusiform</li> <li>Right Fusiform</li> <li>Right Medial Orbitofrontal</li> <li>Left Rostral Anterior Cingulate</li> </ul>                                                                                                           |
| <b>Cocaine</b>                                                                                                                                                                                                                                                                                                                                                                                                                                                                                                                                                                                                                                                                                                                                               |                                                                                                                                                                                                                                                                                                                                                                                                                                                                                                                                                                                                                                                                                                                                   |                                                                                                                                                                                                                                                                                                         |
| <ul style="list-style-type: none"> <li>1. Left Lingual</li> <li>2. Left Rostral Middle Frontal</li> <li>3. Left Entorhinal</li> <li>4. Right Pars Orbitalis</li> <li>5. Right Isthmus Cingulate</li> <li>6. Right Putamen</li> <li>7. Left Amygdala</li> <li>8. Left Isthmus Cingulate</li> <li>9. Right Rostral Middle Frontal</li> </ul>                                                                                                                                                                                                                                                                                                                                                                                                                   | <ul style="list-style-type: none"> <li>1. Left Supramarginal</li> <li>2. Right Bank Superior Temporal</li> <li>3. Right Pars Opercularis</li> <li>4. Left Middle Temporal</li> <li>5. Pars Triangularis</li> <li>6. Right Supramarginal</li> <li>7. Right Superior Temporal</li> <li>8. Left Caudate</li> <li>9. Right Caudal Middle Frontal</li> </ul>                                                                                                                                                                                                                                                                                                                                                                           | <ul style="list-style-type: none"> <li><i>Cortical</i></li> <li>Right Supramarginal</li> </ul>                                                                                                                                                                                                          |



|                               |                             |  |
|-------------------------------|-----------------------------|--|
| 10. Right Post Central        | 10. Left Precentral         |  |
| 11. Right Lingual             | 11. Right Thalamus          |  |
| 12. Left Superior Frontal     | 12. Left Inferior Temporal  |  |
| 13. Right Nucleus Accumbens   | 13. Left Thalamus           |  |
| 14. Left Putamen              | 14. Left Pars Opercularis   |  |
| 15. Right Lateral Occipital   | 15. Right Precentral        |  |
| 16. Left Superior Temporal    | 16. Left Paracentral        |  |
| 17. Right Supramarginal       | 17. Right Hippocampus       |  |
| 18. Right Globus Pallidus     | 18. Right Inferior Parietal |  |
| 19. Right Posterior Cingulate | 19. Left Post Central       |  |
| 20. Left Posterior Cingulate  | 20. Right Pericalcarine     |  |

## Supplemental References

- 47 Stein, J. L. *et al.* Identification of common variants associated with human hippocampal and intracranial volumes. *Nature genetics* **44**, 552-561, doi:10.1038/ng.2250 (2012).
- 48 Boedhoe, P. S. *et al.* Distinct Subcortical Volume Alterations in Pediatric and Adult OCD: A Worldwide Meta- and Mega-Analysis. *Am J Psychiatry*, appiajp201616020201, doi:10.1176/appi.ajp.2016.16020201 (2016).
- 49 van Erp, T. G. *et al.* Subcortical brain volume abnormalities in 2028 individuals with schizophrenia and 2540 healthy controls via the ENIGMA consortium. *Mol Psychiatry* **21**, 585, doi:10.1038/mp.2015.118 (2016).
- 50 Hibar, D. P. *et al.* Common genetic variants influence human subcortical brain structures. *Nature* **520**, 224-229, doi:10.1038/nature14101 (2015).
- 51 Dale, A. M., Fischl, B. & Sereno, M. I. Cortical surface-based analysis - I. Segmentation and surface reconstruction. *NeuroImage* **9**, 179-194, doi:DOI 10.1006/nimg.1998.0395 (1999).
- 52 Desikan, R. S. *et al.* An automated labeling system for subdividing the human cerebral cortex on MRI scans into gyral based regions of interest. *Neuroimage* **31**, 968-980, doi:10.1016/j.neuroimage.2006.01.021 (2006).
- 53 Sanchez, V. D. Advanced support for support vector machines and kernel methods. *Neurocomputing* **55**, 5-20 (2003).
- 54 Blaine, S. K., Milivojevic, V., Fox, H. & Sinha, R. Alcohol Effects on Stress Pathways: Impact on Craving and Relapse Risk. *Can J Psychiatry* **61**, 145-153, doi:10.1177/0706743716632512 (2016).
- 55 Cacciola, J. S., Alterman, A. I., McLellan, A. T., Lin, Y. T. & Lynch, K. G. Initial evidence for the reliability and validity of a "Lite" version of the Addiction Severity Index. *Drug Alcohol Depend* **87**, 297-302, doi:10.1016/j.drugalcdep.2006.09.002 (2007).
- 56 Saunders, J. B., Aasland, O. G., Babor, T. F., de la Fuente, J. R. & Grant, M. Development of the Alcohol Use Disorders Identification Test (AUDIT): WHO Collaborative Project on Early Detection of Persons with Harmful Alcohol Consumption--II. *Addiction* **88**, 791-804 (1993).
- 57 Kessler, R. C. *et al.* Clinical calibration of DSM-IV diagnoses in the World Mental Health (WMH) version of the World Health Organization (WHO) Composite International Diagnostic Interview (WMHCIDI). *Int J Methods Psychiatr Res* **13**, 122-139 (2004).
- 58 Heatherton, T. F., Kozlowski, L. T., Frecker, R. C. & Fagerstrom, K. O. The Fagerstrom Test for Nicotine Dependence: a revision of the Fagerstrom Tolerance Questionnaire. *Br J Addict* **86**, 1119-1127 (1991).

- 59 Kaufman, J. *et al.* Schedule for Affective Disorders and Schizophrenia for School-Age Children-Present and Lifetime Version (K-SADS-PL): initial reliability and validity data. *J Am Acad Child Adolesc Psychiatry* **36**, 980-988, doi:10.1097/00004583-199707000-00021 (1997).
- 60 Sheehan, D. V. *et al.* The Mini-International Neuropsychiatric Interview (M.I.N.I.): the development and validation of a structured diagnostic psychiatric interview for DSM-IV and ICD-10. *J Clin Psychiatry* **59 Suppl 20**, 22-33;quiz 34-57 (1998).
- 61 Torrens, M., Serrano, D., Astals, M., Perez-Dominguez, G. & Martin-Santos, R. Diagnosing comorbid psychiatric disorders in substance abusers: validity of the Spanish versions of the Psychiatric Research Interview for Substance and Mental Disorders and the Structured Clinical Interview for DSM-IV. *Am J Psychiatry* **161**, 1231-1237, doi:10.1176/appi.ajp.161.7.1231 (2004).
- 62 First, M., Spitzer, R., Gibbon, M. & Williams, J. B. W. *Structured Clinical Interview for DSM-IV-TR Axis I Disorders, Research Version, Patient Edition*. (Biometrics Research, New York State Psychiatric Institute, 2002).
- 63 Thayer, R. E. *et al.* Negative and interactive effects of sex, aging, and alcohol abuse on gray matter morphometry. *Hum Brain Mapp* **37**, 2276-2292, doi:10.1002/hbm.23172 (2016).
- 64 Claus, E. D., Ewing, S. W., Filbey, F. M., Sabbineni, A. & Hutchison, K. E. Identifying neurobiological phenotypes associated with alcohol use disorder severity. *Neuropsychopharmacology* **36**, 2086-2096, doi:10.1038/npp.2011.99 (2011).
- 65 Sinha, R. & Li, C. S. Imaging stress- and cue-induced drug and alcohol craving: association with relapse and clinical implications. *Drug Alcohol Rev* **26**, 25-31, doi:10.1080/09595230601036960 (2007).
- 66 Li, C. S., Luo, X., Yan, P., Bergquist, K. & Sinha, R. Altered impulse control in alcohol dependence: neural measures of stop signal performance. *Alcohol Clin Exp Res* **33**, 740-750, doi:10.1111/j.1530-0277.2008.00891.x (2009).
- 67 Seo, D. *et al.* Sex differences in neural responses to stress and alcohol context cues. *Hum Brain Mapp* **32**, 1998-2013, doi:10.1002/hbm.21165 (2011).
- 68 Senatorov, V. V. *et al.* Reduced anterior insula, enlarged amygdala in alcoholism and associated depleted von Economo neurons. *Brain* **138**, 69-79, doi:10.1093/brain/awu305 (2015).
- 69 Grodin, E. N., Lin, H., Durkee, C. A., Hommer, D. W. & Momenan, R. Deficits in cortical, diencephalic and midbrain gray matter in alcoholism measured by VBM: Effects of co-morbid substance abuse. *Neuroimage Clin* **2**, 469-476, doi:10.1016/j.nicl.2013.03.013 (2013).
- 70 Momenan, R. *et al.* Effects of alcohol dependence on cortical thickness as determined by magnetic resonance imaging. *Psychiatry Res* **204**, 101-111, doi:10.1016/j.psychres.2012.05.003 (2012).
- 71 Korucuoglu, O. *et al.* Neural response to alcohol taste cues in youth: effects of the OPRM1 gene. *Addict Biol*, doi:10.1111/adb.12440 (2016).
- 72 Schmaal, L. *et al.* Neural substrates of impulsive decision making modulated by modafinil in alcohol-dependent patients. *Psychol Med* **44**, 2787-2798, doi:10.1017/S0033291714000312 (2014).
- 73 Sjoerds, Z., van den Brink, W., Beekman, A. T., Penninx, B. W. & Veltman, D. J. Response inhibition in alcohol-dependent patients and patients with depression/anxiety: a functional magnetic resonance imaging study. *Psychol Med* **44**, 1713-1725, doi:10.1017/S0033291713002274 (2014).
- 74 Jansen, J. M. *et al.* Brain function during cognitive flexibility and white matter integrity in alcohol-dependent patients, problematic drinkers and healthy controls. *Addict Biol* **20**, 979-989, doi:10.1111/adb.12199 (2015).

- 75 van Holst, R. J., Clark, L., Veltman, D. J., van den Brink, W. & Goudriaan, A. E. Enhanced striatal responses during expectancy coding in alcohol dependence. *Drug Alcohol Depend* **142**, 204-208, doi:10.1016/j.drugalcdep.2014.06.019 (2014).
- 76 van Holst, R. J., de Ruiter, M. B., van den Brink, W., Veltman, D. J. & Goudriaan, A. E. A voxel-based morphometry study comparing problem gamblers, alcohol abusers, and healthy controls. *Drug Alcohol Depend* **124**, 142-148, doi:10.1016/j.drugalcdep.2011.12.025 (2012).
- 77 Tang, D. W. *et al.* Genetic variation in CYP2A6 predicts neural reactivity to smoking cues as measured using fMRI. *Neuroimage* **60**, 2136-2143, doi:10.1016/j.neuroimage.2012.01.119 (2012).
- 78 Claus, E. D., Blaine, S. K., Filbey, F. M., Mayer, A. R. & Hutchison, K. E. Association between nicotine dependence severity, BOLD response to smoking cues, and functional connectivity. *Neuropsychopharmacology* **38**, 2363-2372, doi:10.1038/npp.2013.134 (2013).
- 79 Morales, A. M., Ghahremani, D., Kohno, M., Helleman, G. S. & London, E. D. Cigarette exposure, dependence, and craving are related to insula thickness in young adult smokers. *Neuropsychopharmacology* **39**, 1816-1822, doi:10.1038/npp.2014.48 (2014).
- 80 Zhang, X. *et al.* Anatomical differences and network characteristics underlying smoking cue reactivity. *Neuroimage* **54**, 131-141, doi:10.1016/j.neuroimage.2010.07.063 (2011).
- 81 Rose, E. J. *et al.* Chronic exposure to nicotine is associated with reduced reward-related activity in the striatum but not the midbrain. *Biol Psychiatry* **71**, 206-213, doi:10.1016/j.biopsych.2011.09.013 (2012).
- 82 Sutherland, M. T. *et al.* Down-regulation of amygdala and insula functional circuits by varenicline and nicotine in abstinent cigarette smokers. *Biol Psychiatry* **74**, 538-546, doi:10.1016/j.biopsych.2013.01.035 (2013).
- 83 Ding, X., Yang, Y., Stein, E. A. & Ross, T. J. Multivariate classification of smokers and nonsmokers using SVM-RFE on structural MRI images. *Hum Brain Mapp* **36**, 4869-4879, doi:10.1002/hbm.22956 (2015).
- 84 Luijten, M. *et al.* Brain activation associated with attentional bias in smokers is modulated by a dopamine antagonist. *Neuropsychopharmacology* **37**, 2772-2779, doi:10.1038/npp.2012.143 (2012).
- 85 Bell, R. P., Foxe, J. J., Ross, L. A. & Garavan, H. Intact inhibitory control processes in abstinent drug abusers (I): a functional neuroimaging study in former cocaine addicts. *Neuropharmacology* **82**, 143-150, doi:10.1016/j.neuropharm.2013.02.018 (2014).
- 86 Luo, X. *et al.* Error processing and gender-shared and -specific neural predictors of relapse in cocaine dependence. *Brain* **136**, 1231-1244, doi:10.1093/brain/awt040 (2013).
- 87 Li, C. S., Kemp, K., Milivojevic, V. & Sinha, R. Neuroimaging study of sex differences in the neuropathology of cocaine abuse. *Gen Med* **2**, 174-182 (2005).
- 88 Li, C. S. *et al.* Neural correlates of impulse control during stop signal inhibition in cocaine-dependent men. *Neuropsychopharmacology* **33**, 1798-1806, doi:10.1038/sj.npp.1301568 (2008).
- 89 Seo, D., Ahluwalia, A., Potenza, M. N. & Sinha, R. Gender differences in neural correlates of stress-induced anxiety. *J Neurosci Res* **95**, 115-125, doi:10.1002/jnr.23926 (2017).
- 90 Gu, H. *et al.* Mesocorticolimbic circuits are impaired in chronic cocaine users as demonstrated by resting-state functional connectivity. *Neuroimage* **53**, 593-601, doi:10.1016/j.neuroimage.2010.06.066 (2010).
- 91 Hu, Y., Salmeron, B. J., Gu, H., Stein, E. A. & Yang, Y. Impaired functional connectivity within and between frontostriatal circuits and its association with compulsive drug use and trait impulsivity in cocaine addiction. *JAMA Psychiatry* **72**, 584-592, doi:10.1001/jamapsychiatry.2015.1 (2015).
- 92 Liang, X. *et al.* Interactions between the salience and default-mode networks are disrupted in cocaine addiction. *J Neurosci* **35**, 8081-8090, doi:10.1523/JNEUROSCI.3188-14.2015 (2015).

- 93 Tabibnia, G. *et al.* Different forms of self-control share a neurocognitive substrate. *J Neurosci* **31**, 4805-4810, doi:10.1523/JNEUROSCI.2859-10.2011 (2011).
- 94 Morales, A. M., Lee, B., Hellemann, G., O'Neill, J. & London, E. D. Gray-matter volume in methamphetamine dependence: cigarette smoking and changes with abstinence from methamphetamine. *Drug Alcohol Depend* **125**, 230-238, doi:10.1016/j.drugalcdep.2012.02.017 (2012).
- 95 Stewart, J. L. *et al.* Striatum and insula dysfunction during reinforcement learning differentiates abstinent and relapsed methamphetamine-dependent individuals. *Addiction* **109**, 460-471, doi:10.1111/add.12403 (2014).
- 96 Uhlmann, A. *et al.* Fronto-temporal alterations and affect regulation in methamphetamine dependence with and without a history of psychosis. *Psychiatry Res* **248**, 30-38, doi:10.1016/j.psychres.2016.01.010 (2016).
- 97 Hester, R., Nestor, L. & Garavan, H. Impaired error awareness and anterior cingulate cortex hypoactivity in chronic cannabis users. *Neuropsychopharmacology* **34**, 2450-2458, doi:10.1038/npp.2009.67 (2009).
- 98 Orr, C. *et al.* Altered resting-state connectivity in adolescent cannabis users. *Am J Drug Alcohol Abuse* **39**, 372-381, doi:10.3109/00952990.2013.848213 (2013).
- 99 Cousijn, J. *et al.* Grey matter alterations associated with cannabis use: results of a VBM study in heavy cannabis users and healthy controls. *Neuroimage* **59**, 3845-3851, doi:10.1016/j.neuroimage.2011.09.046 (2012).
- 100 Cousijn, J. *et al.* Neural responses associated with cue-reactivity in frequent cannabis users. *Addict Biol* **18**, 570-580, doi:10.1111/j.1369-1600.2011.00417.x (2013).
- 101 Cousijn, J. *et al.* Effect of baseline cannabis use and working-memory network function on changes in cannabis use in heavy cannabis users: a prospective fMRI study. *Hum Brain Mapp* **35**, 2470-2482, doi:10.1002/hbm.22342 (2014).
- 102 Blanco-Hinojo, L. *et al.* Attenuated frontal and sensory inputs to the basal ganglia in cannabis users. *Addict Biol*, doi:10.1111/adb.12370 (2016).
- 103 Pujol, J. *et al.* Functional connectivity alterations in brain networks relevant to self-awareness in chronic cannabis users. *J Psychiatr Res* **51**, 68-78, doi:10.1016/j.jpsychires.2013.12.008 (2014).
- 104 Batalla, A. *et al.* Modulation of brain structure by catechol-O-methyltransferase Val(158) Met polymorphism in chronic cannabis users. *Addict Biol* **19**, 722-732, doi:10.1111/adb.12027 (2014).
- 105 Yucel, M. *et al.* Regional brain abnormalities associated with long-term heavy cannabis use. *Arch Gen Psychiatry* **65**, 694-701, doi:10.1001/archpsyc.65.6.694 (2008).
- 106 Solowij, N. *et al.* Cerebellar white-matter changes in cannabis users with and without schizophrenia. *Psychol Med* **41**, 2349-2359, doi:10.1017/S003329171100050X (2011).
- 107 Solowij, N. *et al.* Alteration to hippocampal shape in cannabis users with and without schizophrenia. *Schizophr Res* **143**, 179-184, doi:10.1016/j.schres.2012.10.040 (2013).
- 108 Lorenzetti, V. *et al.* Gross morphological brain changes with chronic, heavy cannabis use. *Br J Psychiatry* **206**, 77-78, doi:10.1192/bjp.bp.114.151407 (2015).
- 109 Zalesky, A. *et al.* Effect of long-term cannabis use on axonal fibre connectivity. *Brain* **135**, 2245-2255, doi:10.1093/brain/aws136 (2012).
- 110 Harding, I. H. *et al.* Functional connectivity in brain networks underlying cognitive control in chronic cannabis users. *Neuropsychopharmacology* **37**, 1923-1933, doi:10.1038/npp.2012.39 (2012).
- 111 Jakabek, D., Yucel, M., Lorenzetti, V. & Solowij, N. An MRI study of white matter tract integrity in regular cannabis users: effects of cannabis use and age. *Psychopharmacology (Berl)* **233**, 3627-3637, doi:10.1007/s00213-016-4398-3 (2016).

112 Yucel, M. *et al.* Hippocampal harms, protection and recovery following regular cannabis use. *Transl Psychiatry* **6**, e710, doi:10.1038/tp.2015.201 (2016).
